# Supplementary material for: Sustainable Model for Public Health Emergency Operations Centers for Global Settings
Source: PubMed Central journal article supplement (PMC5711308; doi:10.3201/eid2313.170435), 2017-12
Supplement: 17-0435-Techapp-s1.pdf [file 17-0435-Techapp-s1.pdf]

# Sustainable Model for Public Health Emergency Operations Centers for Global Settings

## Technical Appendix

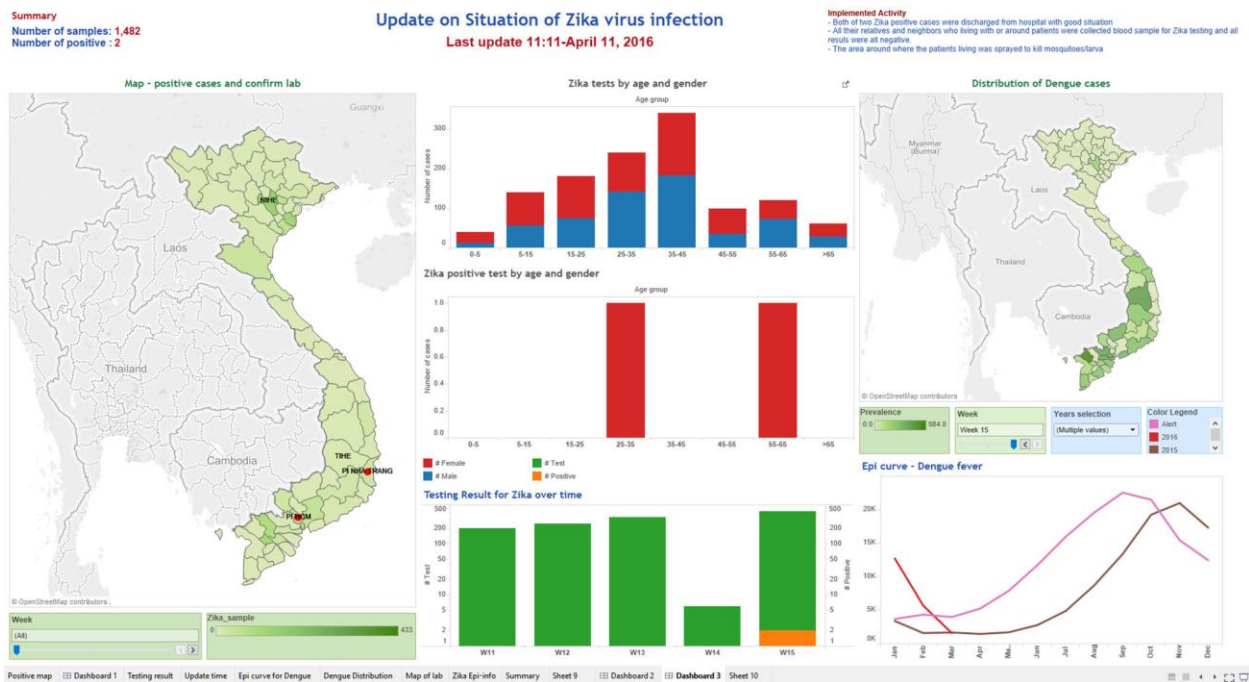

**Technical Appendix Figure.** Data dashboard in national public health emergency operation center for Zika virus, Vietnam.
